# Supplementary material
Source: publisher site journal article supplement (https://journals.iucr.org/services/coeditors/meetings/jmb/2024/AppendixF_ActaF.pdf)
Supplement: Supplementary file 1 [file AppendixF_ActaF.pdf]

# 2022 Journal Performance Data for: Acta Crystallographica Section F-Structural Biology Communications

ISSN

N/A

EISSN

2053-230X

JCR ABBREVIATION

ACTA CRYSTALLOGR F

ISO ABBREVIATION

Acta Crystallogr. F-Struct. Biol.  
Commun.

## Journal Information

EDITION

Science Citation Index  
Expanded (SCIE)

CATEGORY

BIOCHEMISTRY & MOLECULAR  
BIOLOGY - SCIE  
CRYSTALLOGRAPHY - SCIE  
BIOPHYSICS - SCIE  
BIOCHEMICAL RESEARCH  
METHODS - SCIE

LANGUAGES

English

REGION

DENMARK

1ST ELECTRONIC JCR YEAR

2007

## Publisher Information

PUBLISHER

INT UNION  
CRYSTALLOGRAPHY

ADDRESS

2 ABBEY SQ, CHESTER CH1  
2HU, ENGLAND

PUBLICATION FREQUENCY

12 issues/year

# Journal's Performance

## Journal Impact Factor

The Journal Impact Factor (JIF) is a journal-level metric calculated from data indexed in the Web of Science Core Collection. It should be used with careful attention to the many factors that influence citation rates, such as the volume of publication and citations characteristics of the subject area and type of journal. The Journal Impact Factor can complement expert opinion and informed peer review. In the case of academic evaluation for tenure, it is inappropriate to use a journal-level metric as a proxy measure for individual researchers, institutions, or articles. [Learn more](#)

2022 JOURNAL IMPACT FACTOR

0.9

2022 JOURNAL IMPACT FACTOR WITHOUT SELF CITATIONS

0.9

## Journal Impact Factor Trend 2022

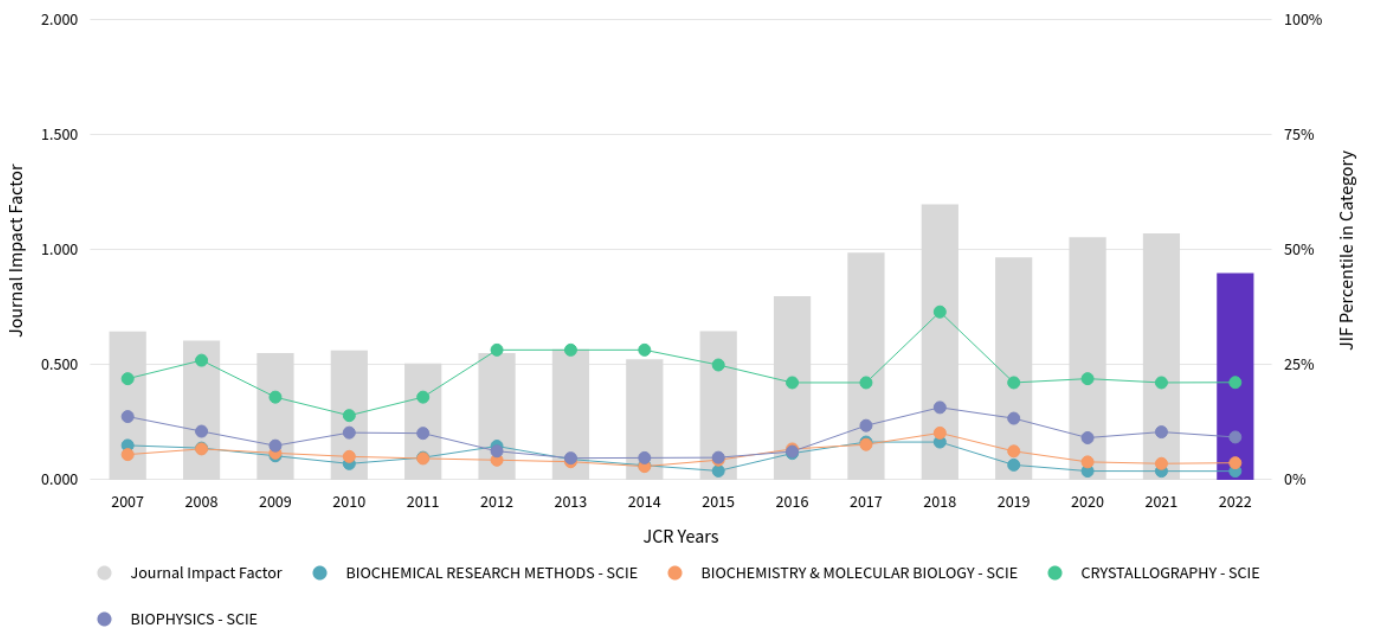

Journal Impact Factor is calculated using the following metrics

$$\frac{\text{Citations in 2022 to items published in 2020 (84) - 2021 (43)}}{\text{Number of citable items in 2020 (81) + 2021 (61)}} = \frac{127}{142} = 0.9$$

Journal Impact Factor without self cites is calculated using the following metrics

$$\frac{\text{Citations in 2022 to items published in 2020 (84) + 2021 (43) - Self Citations in 2022 to items published in 2020 (4) + 2021 (2)}}{\text{Number of citable items in 2020 (81) + 2021 (61)}} = \frac{127 - 6}{142} = 0.9$$

## Journal Impact Factor Contributing Items

### Citable Items (142)

| TITLE                                                                                                                                                                                                                                                                                                                                                                                             | CITATION COUNT                                                                           |
|---------------------------------------------------------------------------------------------------------------------------------------------------------------------------------------------------------------------------------------------------------------------------------------------------------------------------------------------------------------------------------------------------|------------------------------------------------------------------------------------------|
| <p>High-resolution crystal structures of Escherichia coli FtsZ bound to GDP and GTP<br/>Authors: Schumacher, Maria A.;Ohashi, Tomoo;Corbin, Lauren;Erickson, Harold P.<br/>Volume: 76<br/>Accession number: WOS:000514099800007<br/>Document Type: Article</p>                                                                                                                                    | 6<br> |
| <p>Room-temperature neutron and X-ray data collection of 3CL M-pro from SARS-CoV-2<br/>Authors: Kneller, Daniel W.;Phillips, Gwyndalyn;Kovalevsky, Andrey;Coates, Leighton<br/>Volume: 76<br/>Accession number: WOS:000577144100004<br/>Document Type: Article</p>                                                                                                                                | 5<br> |
| <p>Glycogen phosphorylase revisited: extending the resolution of the R- and T-state structures of the free enzyme and in complex with allosteric activators<br/>Authors: Leonidas, Demetres D.;Zographos, Spyros E.;Tsitsanou, Katerina E.;Skamnaki, Vassiliki T.;Stravodimos, George;Kyriakis, Efthimios<br/>Volume: 77<br/>Accession number: WOS:000692919000004<br/>Document Type: Article</p> | 4                                                                                        |
| <p>Structural and biochemical characterization of mitochondrial citrate synthase 4 from Arabidopsis thaliana<br/>Authors: Nishio, Kazuya;Mizushima, Tsunehiro<br/>Volume: 76<br/>Accession number: WOS:000518473900002<br/>Document Type: Article</p>                                                                                                                                             | 3                                                                                        |
| <p>Structural characterization of three noncanonical NTF2-like superfamily proteins: implications for polyketide biosynthesis<br/>Authors: Vuksanovic, Nemanja;Zhu, Xuechen;Serrano, Dante A.;Siitonen, Vilja;Metsa-Ketela, Mikko;Melancon, Charles E., III;Silvaggi, Nicholas R.<br/>Volume: 76<br/>Accession number: WOS:000555819200007<br/>Document Type: Article</p>                         | 3                                                                                        |

Showing 1-5 rows of 142 total (use export in the relevant section to download the full table)

## Journal Impact Factor Contributing Items

### Citing Sources (93)

| SOURCE NAME                                                        | COUNT |
|--------------------------------------------------------------------|-------|
| ACTA CRYSTALLOGRAPHICA SECTION F-STRUCTURAL BIOLOGY COMMUNICATIONS | 6     |
| ACTA CRYSTALLOGRAPHICA SECTION D-STRUCTURAL BIOLOGY                | 4     |
| FRONTIERS IN MOLECULAR BIOSCIENCES                                 | 4     |
| FEBS JOURNAL                                                       | 3     |
| JOURNAL OF MEDICINAL CHEMISTRY                                     | 3     |
| NATURE COMMUNICATIONS                                              | 3     |
| ACS OMEGA                                                          | 2     |
| ANGEWANDTE CHEMIE-INTERNATIONAL EDITION                            | 2     |
| COMMUNICATIONS BIOLOGY                                             | 2     |
| DALTON TRANSACTIONS                                                | 2     |
| FEBS LETTERS                                                       | 2     |
| FEBS OPEN BIO                                                      | 2     |
| FRONTIERS IN MICROBIOLOGY                                          | 2     |
| FRONTIERS IN PLANT SCIENCE                                         | 2     |
| INTERNATIONAL JOURNAL OF BIOLOGICAL MACROMOLECULES                 | 2     |
| IUCRJ                                                              | 2     |
| JOURNAL OF SEPARATION SCIENCE                                      | 2     |
| MBIO                                                               | 2     |
| MOLECULES                                                          | 2     |
| NUCLEIC ACIDS RESEARCH                                             | 2     |

Showing 1-20 rows of 93 total (use export in the relevant section to download the full table)

# Journal Citation Indicator (JCI)

0.28

The Journal Citation Indicator (JCI) is the average Category Normalized Citation Impact (CNCI) of citable items (articles & reviews) published by a journal over a recent three year period. The average JCI in a category is 1. Journals with a JCI of 1.5 have 50% more citation impact than the average in that category. It may be used alongside other metrics to help you evaluate journals. [Learn more](#)

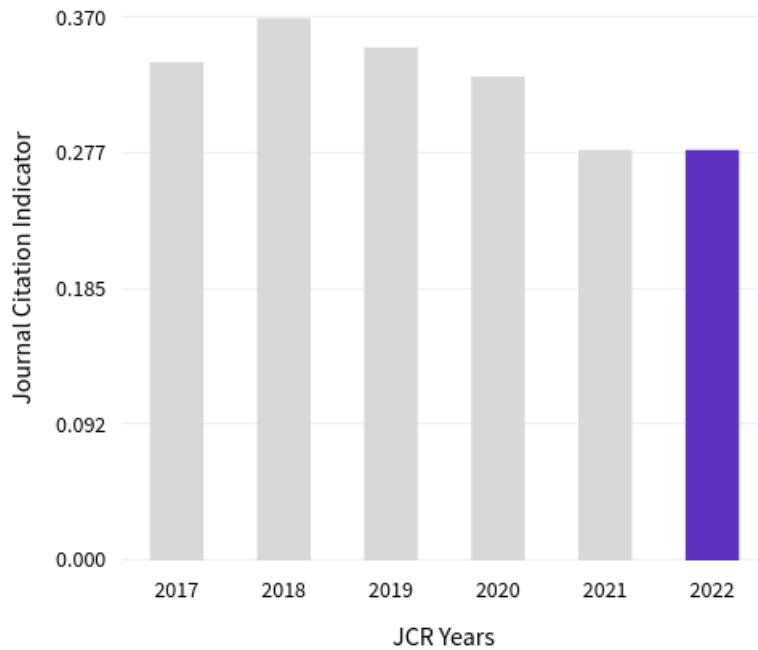

# Total Citations

1,805

The total number of times that a journal has been cited by all journals included in the database in the JCR year. Citations to journals listed in JCR are compiled annually from the JCR years combined database, regardless of which JCR edition lists the journal.

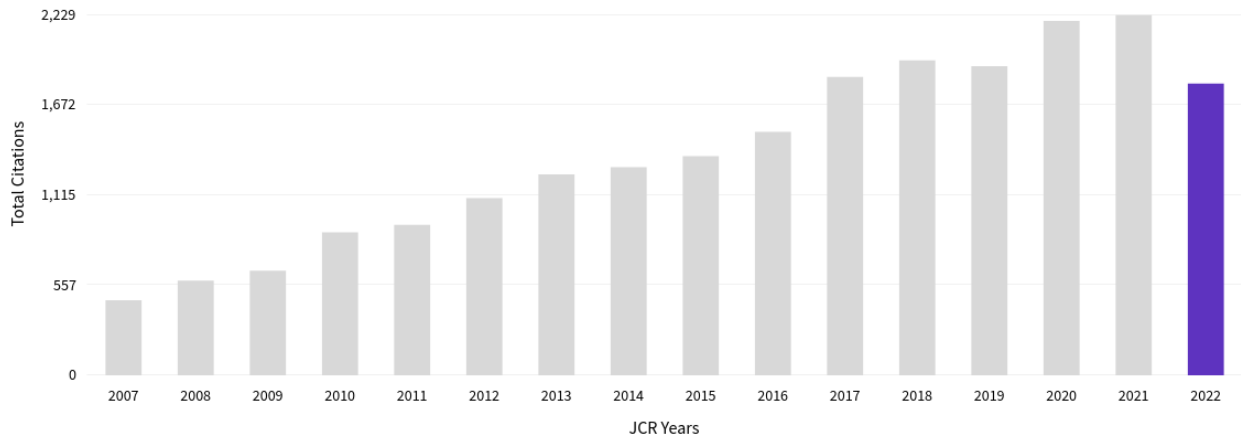

# Citation Distribution

The Citation Distribution shows the frequency with which items published in the year or two years prior were cited in the JCR data year (i.e., the component of the calculation of the JIF). The graph has similar functionality as the JIF Trend graph, including hover-over data descriptions for each data point, and an interactive legend where each data element's legend can be used as a toggle. You can view Articles, Reviews, or Non-Citable (other) items to the JIF numerator. [Learn more](#)

ARTICLE CITATION MEDIAN

1

REVIEW CITATION MEDIAN

3

UNLINKED CITATIONS

1

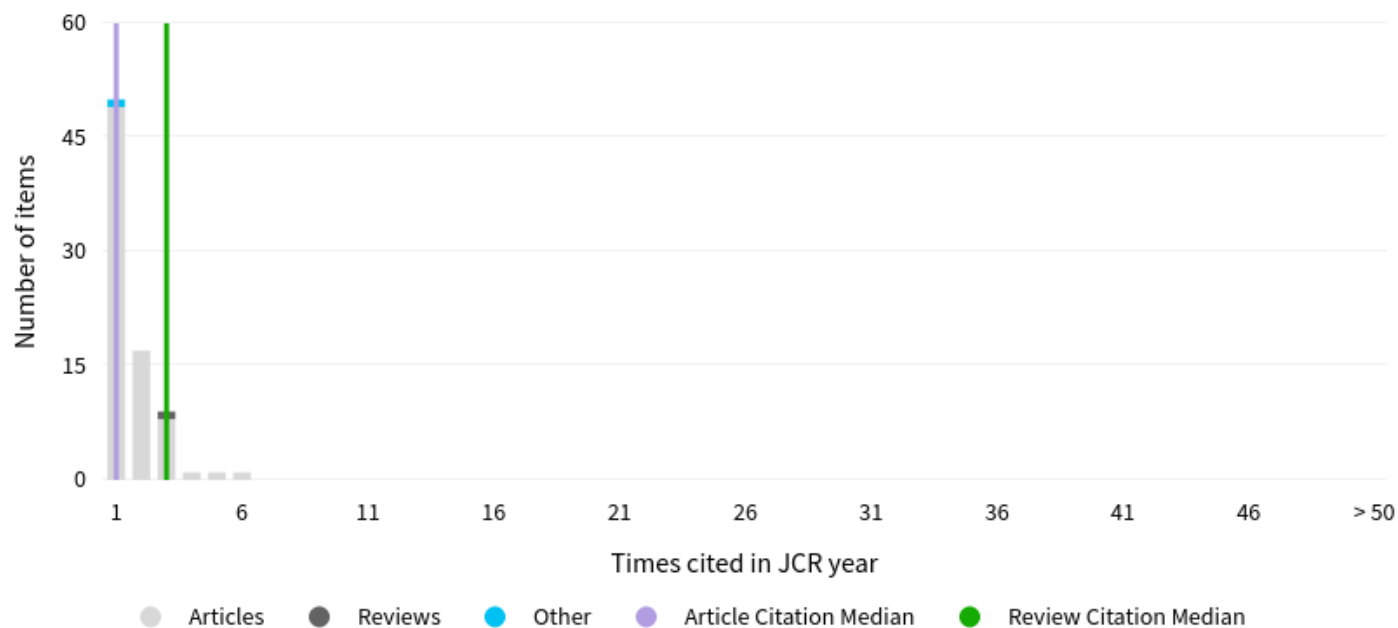

## 0 times cited

ARTICLES

64

REVIEWS

0

OTHER

7

## Open Access (OA)

The data included in this tile summarizes the items published in the journal in the JCR data year and in the previous two years. This three-year set of published items is used to provide descriptive analysis of the content and community of the journal. [Learn more](#)

### Items

TOTAL CITABLE

**193**

% OF CITABLE OA

**38.34%**

CITABLE

● GOLD OPEN ACCESS

74 / 36.27%

● SUBSCRIPTION OR BRONZE

119 / 58.33%

NON-CITABLE

● OTHER (NON-CITABLE ITEMS)

11 / 5.39%

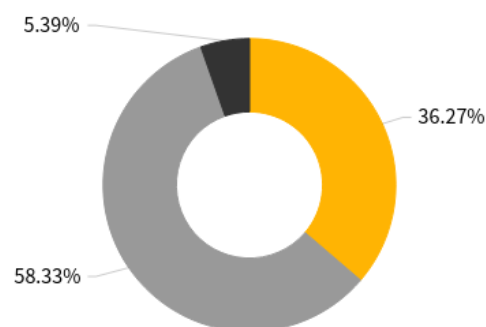

### Citations\*

TOTAL CITABLE

**141**

% OF CITABLE OA

**43.97%**

CITABLE

● GOLD OPEN ACCESS

62 / 42.18%

● SUBSCRIPTION OR BRONZE

79 / 53.74%

NON-CITABLE

● OTHER (NON-CITABLE ITEMS)

2 / 1.36%

● UNLINKED CITATIONS

4 / 2.72%

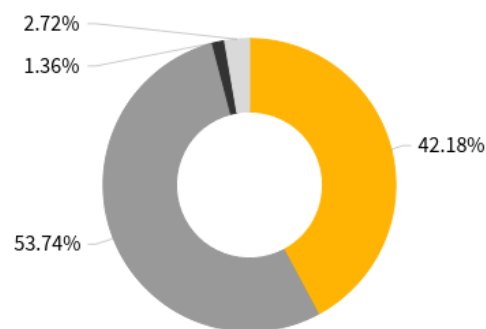

\* Citations in 2022 to items published in (2020-2022)

## Rank by Journal Impact factor

Journals within a category are sorted in descending order by Journal Impact Factor (JIF) resulting in the Category Ranking below. A separate rank is shown for each category in which the journal is listed in JCR. Data for the most recent year is presented at the top of the list, with other years shown in reverse chronological order. [Learn more](#)

### EDITION

Science Citation Index Expanded (SCIE)

### CATEGORY

BIOCHEMICAL RESEARCH METHODS

**76/77**

| JCR YEAR | JIF RANK | QUART ILE | JIF PERCENTILE |                                 |
|----------|----------|-----------|----------------|---------------------------------|
| 2022     | 76/77    | Q4        | 1.9            | <div style="width: 10%;"></div> |
| 2021     | 78/79    | Q4        | 1.90           | <div style="width: 10%;"></div> |
| 2020     | 77/78    | Q4        | 1.92           | <div style="width: 10%;"></div> |
| 2019     | 75/77    | Q4        | 3.25           | <div style="width: 10%;"></div> |
| 2018     | 73/79    | Q4        | 8.23           | <div style="width: 10%;"></div> |
| 2017     | 73/79    | Q4        | 8.23           | <div style="width: 10%;"></div> |
| 2016     | 74/78    | Q4        | 5.77           | <div style="width: 10%;"></div> |
| 2015     | 76/77    | Q4        | 1.95           | <div style="width: 10%;"></div> |
| 2014     | 77/79    | Q4        | 3.16           | <div style="width: 10%;"></div> |
| 2013     | 75/78    | Q4        | 4.49           | <div style="width: 10%;"></div> |
| 2012     | 70/75    | Q4        | 7.33           | <div style="width: 10%;"></div> |
| 2011     | 69/72    | Q4        | 4.86           | <div style="width: 10%;"></div> |
| 2010     | 69/71    | Q4        | 3.52           | <div style="width: 10%;"></div> |
| 2009     | 64/67    | Q4        | 5.22           | <div style="width: 10%;"></div> |
| 2008     | 61/65    | Q4        | 6.92           | <div style="width: 10%;"></div> |
| 2007     | 56/60    | Q4        | 7.50           | <div style="width: 10%;"></div> |

### EDITION

Science Citation Index Expanded (SCIE)

### CATEGORY

BIOCHEMISTRY & MOLECULAR BIOLOGY

**275/285**

| JCR YEAR | JIF RANK | QUART ILE | JIF PERCENTILE |                                 |
|----------|----------|-----------|----------------|---------------------------------|
| 2022     | 275/285  | Q4        | 3.7            | <div style="width: 10%;"></div> |
| 2021     | 287/297  | Q4        | 3.54           | <div style="width: 10%;"></div> |
| 2020     | 284/295  | Q4        | 3.90           | <div style="width: 10%;"></div> |
| 2019     | 279/297  | Q4        | 6.23           | <div style="width: 10%;"></div> |
| 2018     | 269/299  | Q4        | 10.20          | <div style="width: 10%;"></div> |
| 2017     | 271/293  | Q4        | 7.68           | <div style="width: 10%;"></div> |
| 2016     | 271/290  | Q4        | 6.72           | <div style="width: 10%;"></div> |
| 2015     | 277/289  | Q4        | 4.33           | <div style="width: 10%;"></div> |
| 2014     | 282/290  | Q4        | 2.93           | <div style="width: 10%;"></div> |
| 2013     | 280/291  | Q4        | 3.95           | <div style="width: 10%;"></div> |
| 2012     | 278/290  | Q4        | 4.31           | <div style="width: 10%;"></div> |
| 2011     | 277/290  | Q4        | 4.66           | <div style="width: 10%;"></div> |
| 2010     | 272/286  | Q4        | 5.07           | <div style="width: 10%;"></div> |
| 2009     | 267/283  | Q4        | 5.83           | <div style="width: 10%;"></div> |
| 2008     | 257/275  | Q4        | 6.73           | <div style="width: 10%;"></div> |
| 2007     | 249/263  | Q4        | 5.51           | <div style="width: 10%;"></div> |

## EDITION

Science Citation Index Expanded (SCIE)

## CATEGORY

BIOPHYSICS

**64/70**

| JCR YEAR | JIF RANK | QUART ILE | JIF PERCENTILE |  |
|----------|----------|-----------|----------------|--|
| 2022     | 64/70    | Q4        | 9.3            |  |
| 2021     | 65/72    | Q4        | 10.42          |  |
| 2020     | 65/71    | Q4        | 9.15           |  |
| 2019     | 62/71    | Q4        | 13.38          |  |
| 2018     | 62/73    | Q4        | 15.75          |  |
| 2017     | 64/72    | Q4        | 11.81          |  |
| 2016     | 69/73    | Q4        | 6.16           |  |
| 2015     | 69/72    | Q4        | 4.86           |  |
| 2014     | 70/73    | Q4        | 4.79           |  |
| 2013     | 71/74    | Q4        | 4.73           |  |
| 2012     | 68/72    | Q4        | 6.25           |  |
| 2011     | 67/74    | Q4        | 10.14          |  |
| 2010     | 66/73    | Q4        | 10.27          |  |
| 2009     | 69/74    | Q4        | 7.43           |  |
| 2008     | 64/71    | Q4        | 10.56          |  |
| 2007     | 60/69    | Q4        | 13.77          |  |

## EDITION

Science Citation Index Expanded (SCIE)

## CATEGORY

CRYSTALLOGRAPHY

**21/26**

| JCR YEAR | JIF RANK | QUART ILE | JIF PERCENTILE |  |
|----------|----------|-----------|----------------|--|
| 2022     | 21/26    | Q4        | 21.2           |  |
| 2021     | 21/26    | Q4        | 21.15          |  |
| 2020     | 20/25    | Q4        | 22.00          |  |
| 2019     | 21/26    | Q4        | 21.15          |  |
| 2018     | 17/26    | Q3        | 36.54          |  |
| 2017     | 21/26    | Q4        | 21.15          |  |
| 2016     | 21/26    | Q4        | 21.15          |  |
| 2015     | 20/26    | Q4        | 25.00          |  |
| 2014     | 17/23    | Q3        | 28.26          |  |
| 2013     | 17/23    | Q3        | 28.26          |  |
| 2012     | 17/23    | Q3        | 28.26          |  |
| 2011     | 21/25    | Q4        | 18.00          |  |
| 2010     | 22/25    | Q4        | 14.00          |  |
| 2009     | 21/25    | Q4        | 18.00          |  |
| 2008     | 19/25    | Q4        | 26.00          |  |
| 2007     | 20/25    | Q4        | 22.00          |  |

## Rank by Journal Citation Indicator (JCI)

Journals within a category are sorted in descending order by Journal Citation Indicator (JCI) resulting in the Category Ranking below. A separate rank is shown for each category in which the journal is listed in JCR. Data for the most recent year is presented at the top of the list, with other years shown in reverse chronological order. [Learn more](#)

### CATEGORY

#### BIOCHEMICAL RESEARCH METHODS

**81/83**

| JCR YEAR | JCI RANK | QUART ILE | JCI PERCENTILE |  |
|----------|----------|-----------|----------------|--|
| 2022     | 81/83    | Q4        | 3.01           |  |
| 2021     | 79/84    | Q4        | 6.55           |  |
| 2020     | 76/82    | Q4        | 7.93           |  |
| 2019     | 75/82    | Q4        | 9.15           |  |
| 2018     | 73/82    | Q4        | 11.59          |  |
| 2017     | 71/79    | Q4        | 10.76          |  |

### CATEGORY

#### BIOCHEMISTRY & MOLECULAR BIOLOGY

**282/315**

| JCR YEAR | JCI RANK | QUART ILE | JCI PERCENTILE |  |
|----------|----------|-----------|----------------|--|
| 2022     | 282/315  | Q4        | 10.63          |  |
| 2021     | 289/322  | Q4        | 10.40          |  |
| 2020     | 274/311  | Q4        | 12.06          |  |
| 2019     | 264/310  | Q4        | 15.00          |  |
| 2018     | 256/308  | Q4        | 17.05          |  |
| 2017     | 259/306  | Q4        | 15.52          |  |

### CATEGORY

#### BIOPHYSICS

**66/74**

| JCR YEAR | JCI RANK | QUART ILE | JCI PERCENTILE |  |
|----------|----------|-----------|----------------|--|
| 2022     | 66/74    | Q4        | 11.49          |  |
| 2021     | 66/76    | Q4        | 13.82          |  |
| 2020     | 64/74    | Q4        | 14.19          |  |
| 2019     | 61/74    | Q4        | 18.24          |  |
| 2018     | 59/73    | Q4        | 19.86          |  |
| 2017     | 62/73    | Q4        | 15.75          |  |

### CATEGORY

#### CRYSTALLOGRAPHY

**25/33**

| JCR YEAR | JCI RANK | QUART ILE | JCI PERCENTILE |  |
|----------|----------|-----------|----------------|--|
| 2022     | 25/33    | Q4        | 25.76          |  |
| 2021     | 25/33    | Q4        | 25.76          |  |
| 2020     | 22/33    | Q3        | 34.85          |  |
| 2019     | 22/33    | Q3        | 34.85          |  |
| 2018     | 21/32    | Q3        | 35.94          |  |
| 2017     | 21/31    | Q3        | 33.87          |  |

# Citation network

## Cited Half-life

8.8 years

The Cited Half-Life is the median age of the items in this journal that were cited in the JCR year. Half of a journal's cited items were published more recently than the cited half-life.

TOTAL NUMBER OF CITES

1,805

NON-SELF CITATIONS

1,747

SELF CITATIONS

58

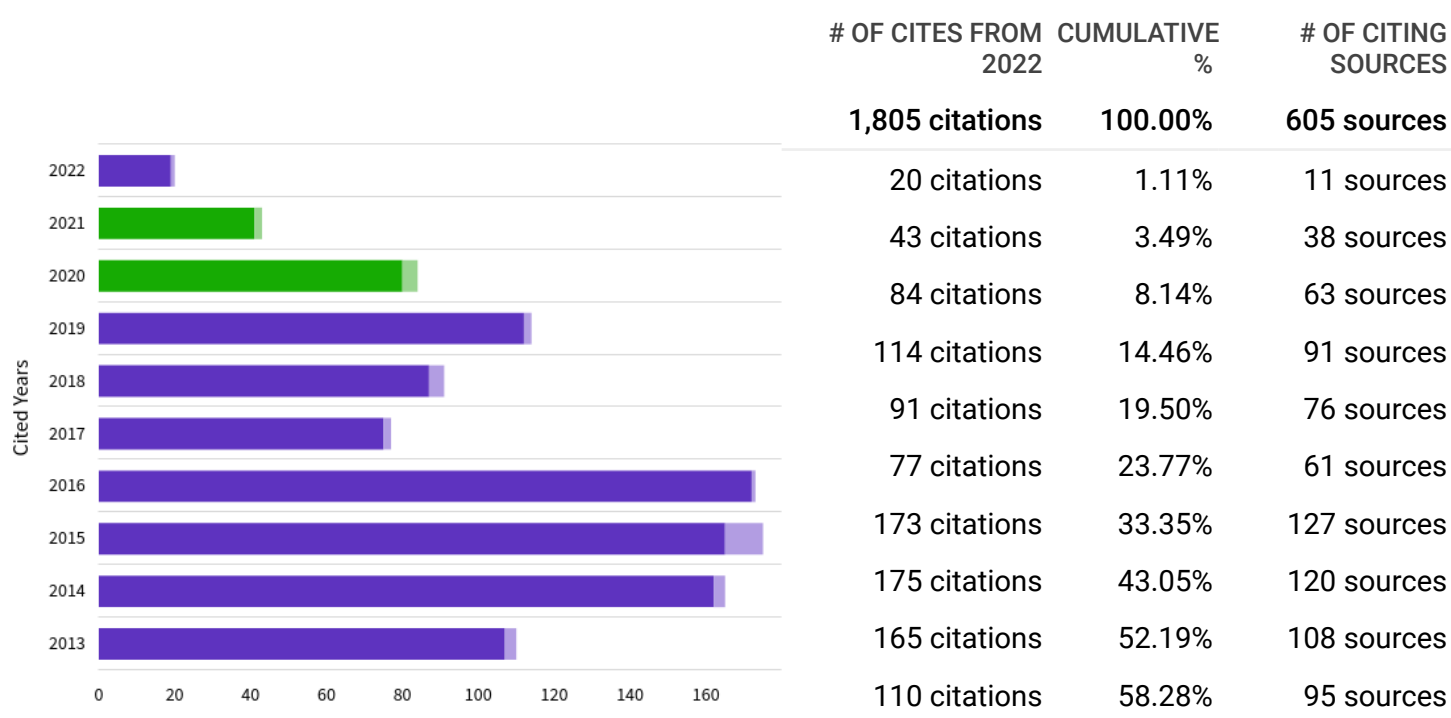

Previous years:  
753 citations

- Non-self citations: citations to the journal from the items in other sources
- Citations to items in the journal from items in the same journal
- Citations used to calculate the Impact Factor

## Citing titles in all years

### Acta Crystallographica Section F-Structural Biology Communications

|    | SOURCE NAME                                                                     | COUNT |
|----|---------------------------------------------------------------------------------|-------|
|    | All Others                                                                      | 339   |
| 1  | Acta Crystallographica Section F-Structural Biology Communications              | 58    |
| 2  | INTERNATIONAL JOURNAL OF MOLECULAR SCIENCES                                     | 56    |
| 3  | JOURNAL OF BIOLOGICAL CHEMISTRY                                                 | 35    |
| 4  | MOLECULES                                                                       | 35    |
| 5  | Acta Crystallographica Section D-Structural Biology                             | 29    |
| 6  | Frontiers in Molecular Biosciences                                              | 27    |
| 7  | Scientific Reports                                                              | 25    |
| 8  | Nature Communications                                                           | 24    |
| 9  | Frontiers in Microbiology                                                       | 22    |
| 10 | Crystals                                                                        | 21    |
| 11 | International Journal of Biological Macromolecules                              | 18    |
| 12 | JOURNAL OF BIOMOLECULAR STRUCTURE & DYNAMICS                                    | 17    |
| 13 | JOURNAL OF MEDICINAL CHEMISTRY                                                  | 17    |
| 14 | NUCLEIC ACIDS RESEARCH                                                          | 17    |
| 15 | PROCEEDINGS OF THE NATIONAL ACADEMY OF SCIENCES OF THE UNITED STATES OF AMERICA | 17    |
| 16 | Frontiers in Plant Science                                                      | 15    |
| 17 | PROTEIN SCIENCE                                                                 | 15    |
| 18 | ACS Omega                                                                       | 14    |
| 19 | Antioxidants                                                                    | 13    |
| 20 | Biomolecules                                                                    | 13    |

Showing 1 - 20 rows of 261 total (use export in the relevant section to download the full table)

# Citing Half-life

## 11.9 years

The Citing Half-Life is the median age of items in other publications cited by this journal in the JCR year.

TOTAL NUMBER OF CITES

2,010

NON-SELF CITATIONS

1,952

SELF CITATIONS

58

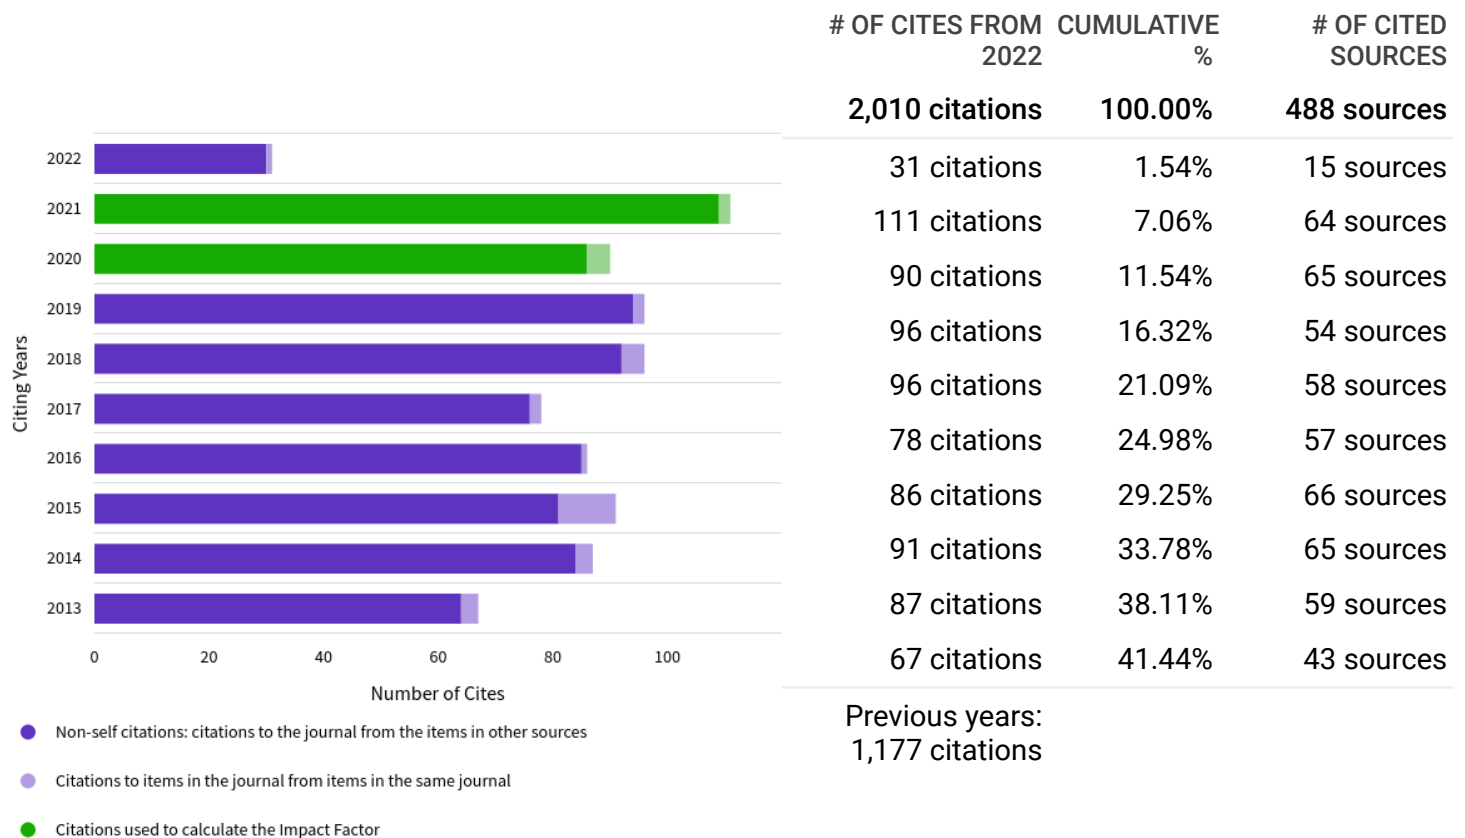

## Cited titles in all years

Acta Crystallographica Section F-Structural Biology Communications

|    | SOURCE NAME                                                                     | COUNT |
|----|---------------------------------------------------------------------------------|-------|
|    | All Others                                                                      | 305   |
| 1  | Acta Crystallographica Section D-Structural Biology                             | 334   |
| 2  | JOURNAL OF BIOLOGICAL CHEMISTRY                                                 | 76    |
| 3  | BIOCHEMISTRY                                                                    | 68    |
| 4  | NUCLEIC ACIDS RESEARCH                                                          | 59    |
| 5  | Acta Crystallographica Section F-Structural Biology Communications              | 58    |
| 6  | JOURNAL OF MOLECULAR BIOLOGY                                                    | 56    |
| 7  | JOURNAL OF APPLIED CRYSTALLOGRAPHY                                              | 54    |
| 8  | PROCEEDINGS OF THE NATIONAL ACADEMY OF SCIENCES OF THE UNITED STATES OF AMERICA | 43    |
| 9  | PROTEIN SCIENCE                                                                 | 40    |
| 10 | NATURE                                                                          | 29    |
| 11 | Nature Communications                                                           | 24    |
| 12 | JOURNAL OF STRUCTURAL BIOLOGY                                                   | 20    |
| 13 | JOURNAL OF BACTERIOLOGY                                                         | 18    |
| 14 | BIOCHEMICAL JOURNAL                                                             | 17    |
| 15 | INTERNATIONAL JOURNAL OF SYSTEMATIC AND EVOLUTIONARY MICROBIOLOGY               | 16    |
| 16 | JOURNAL OF SYNCHROTRON RADIATION                                                | 16    |
| 17 | NATURE STRUCTURAL & MOLECULAR BIOLOGY                                           | 16    |
| 18 | PLoS One                                                                        | 16    |
| 19 | Scientific Reports                                                              | 16    |
| 20 | FEBS Journal                                                                    | 15    |

Showing 1 - 20 rows of 159 total (use export in the relevant section to download the full table)

# Journal Citation Relationships

## Cited Data

Top 20 journals citing ACTA CRYSTALLOGR F by number of citations

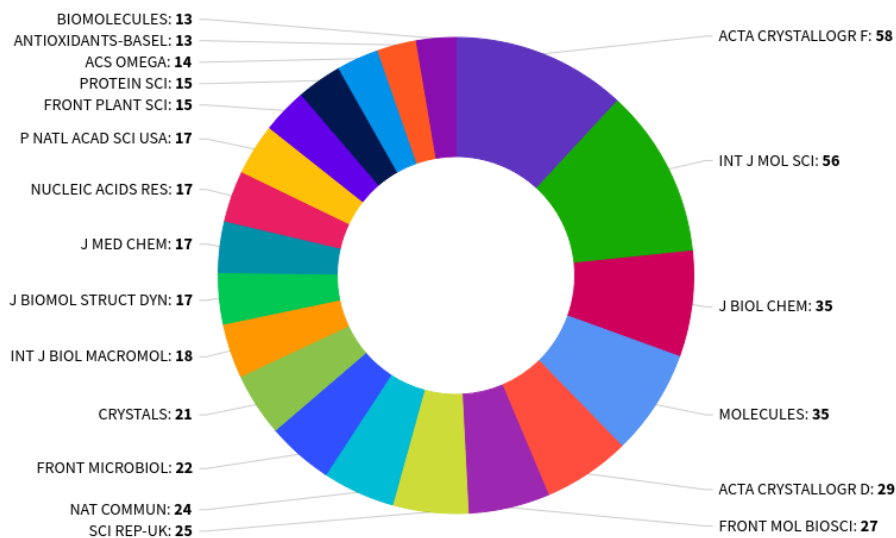

# Citing Data

## Top 20 journals cited by ACTA CRYSTALLOGR F by number of citations

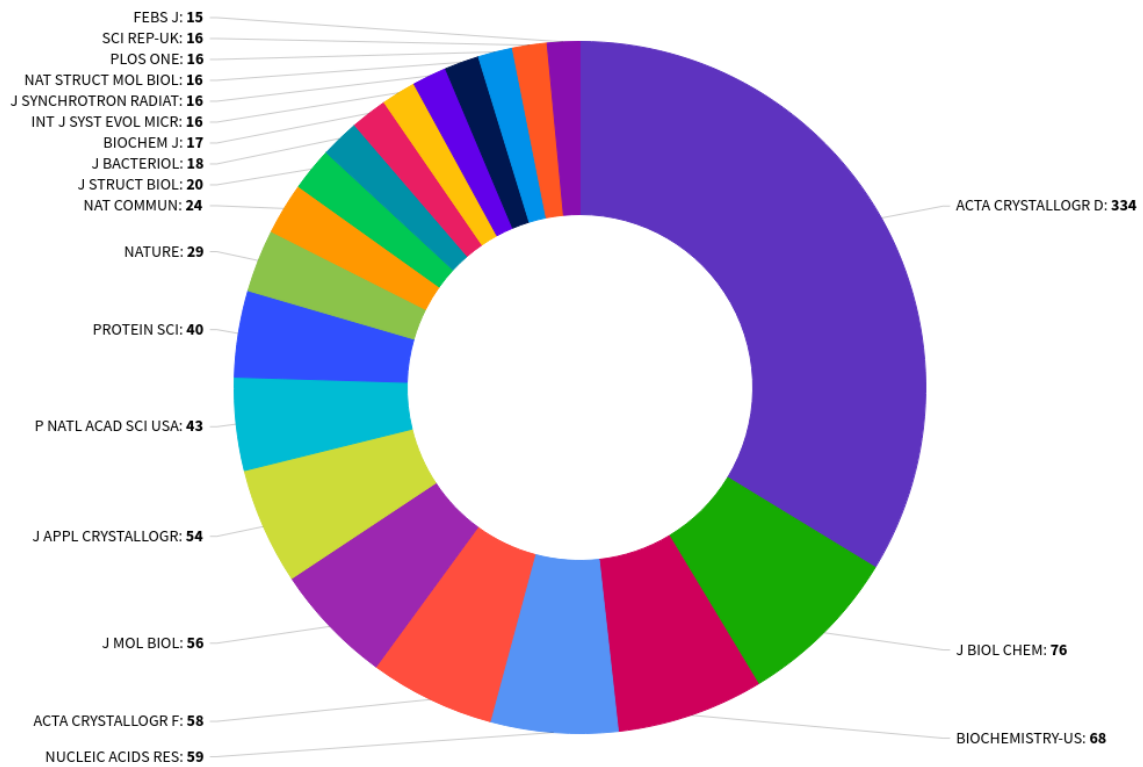

# Content metrics

## Source data

This tile shows the breakdown of document types published by the journal. Citable Items are Articles and Reviews. For the purposes of calculating JIF, a JCR year considers the publications of that journal in the two prior years. [Learn more](#)

### 51 total citable items

|                             | ARTICLES | REVIEWS | COMBINED (C) | OTHER DOCUMENT TYPES (O) | PERCENTAGE |
|-----------------------------|----------|---------|--------------|--------------------------|------------|
| NUMBER IN JCR YEAR 2022 (A) | 50       | 1       | 51           | 3                        | 94%        |
| NUMBER OF REFERENCES (B)    | 1,879    | 112     | 1,991        | 19                       | 99%        |
| RATIO (B/A)                 | 37.6     | 112.0   | 39.0         | 6.3                      |            |

# Average JIF Percentile

The Average Journal Impact Factor Percentile takes the sum of the JIF Percentile rank for each category under consideration, then calculates the average of those values. [Learn more](#)

ALL CATEGORIES AVERAGE

**9.0**

EDITION

Science Citation Index Expanded

CRYSTALLOGRAPHY

**21.2**

BIOCHEMICAL RESEARCH METHODS

**1.9**

BIOCHEMISTRY & MOLECULAR  
BIOLOGY

**3.7**

BIOPHYSICS

**9.3**

# Contributions by Organizations

Organizations that have contributed the most papers to the journal in the most recent three-year period. [Learn more](#)

| RANK | ORGANIZATION                               | COUNT |                                                                                    |
|------|--------------------------------------------|-------|------------------------------------------------------------------------------------|
| 1    | CHINESE ACADEMY OF SCIENCES                | 10    |  |
| 2    | SEATTLE STRUCT GENOM CTR INFECT DIS SSGCID | 9     |  |
| 3    | HAMPTON UNIVERSITY                         | 8     |  |
| -    | UNITED STATES DEPARTMENT OF ENERGY (DOE)   | 8     |  |
| 5    | DEPARTMENT OF BIOTECHNOLOGY (DBT) INDIA    | 6     |  |
| -    | HELMHOLTZ ASSOCIATION                      | 6     |  |
| -    | OSAKA UNIVERSITY                           | 6     |  |
| -    | SEATTLE CHILDREN'S HOSPITAL                | 6     |  |

Showing 1 - 8 rows of 308 total (use export in the relevant section to download the full table)

# Contributions by country/region

Countries or Regions that have contributed the most papers to the journal in the most recent three-year period. [Learn more](#)

| RANK | COUNTRY/REGION        | COUNT |                                                                                      |
|------|-----------------------|-------|--------------------------------------------------------------------------------------|
| 1    | USA                   | 55    |  |
| 2    | England               | 32    |  |
| -    | Japan                 | 32    |  |
| 4    | CHINA MAINLAND        | 21    |  |
| 5    | GERMANY (FED REP GER) | 20    |  |
| 6    | India                 | 15    |  |
| 7    | Australia             | 10    |   |
| 8    | Italy                 | 6     |   |

Showing 1 - 8 rows of 41 total (use export in the relevant section to download the full table)

# Additional metrics

## Eigenfactor score

**0.00118**

The Eigenfactor Score is a reflection of the density of the network of citations around the journal using 5 years of cited content as cited by the Current Year. It considers both the number of citations and the source of those citations, so that highly cited sources will influence the network more than less cited sources. The Eigenfactor calculation does not include journal self-citations. [Learn more](#)

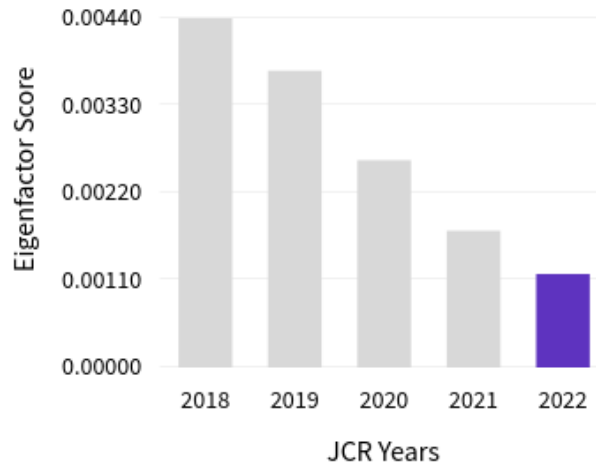

## Normalized Eigenfactor

**0.25761**

The Normalized Eigenfactor Score is the Eigenfactor score normalized, by rescaling the total number of journals in the JCR each year, so that the average journal has a score of 1. Journals can then be compared and influence measured by their score relative to 1. [Learn more](#)

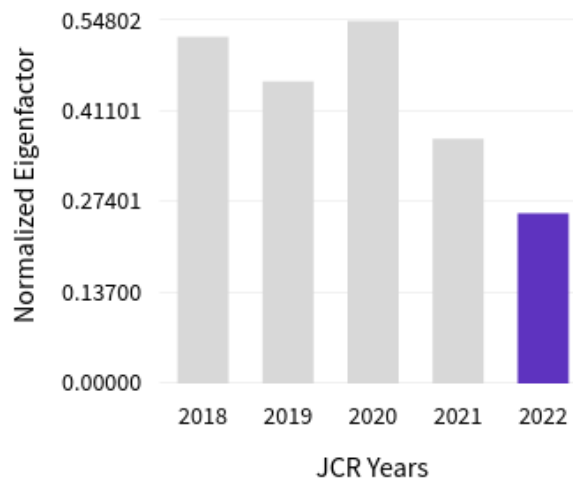

## Article influence score

**0.292**

The Article Influence Score normalizes the Eigenfactor Score according to the cumulative size of the cited journal across the prior five years. The mean Article Influence Score for each article is 1.00. A score greater than 1.00 indicates that each article in the journal has above-average influence. [Learn more](#)

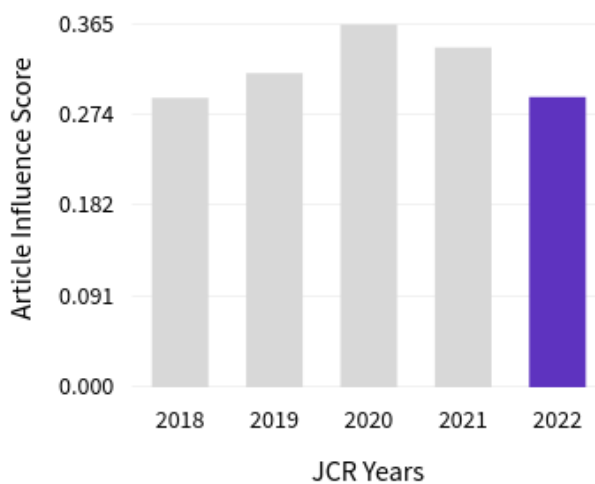

## 5 year Impact Factor

0.9

The 5-year Impact Factor is the average number of times articles from the journal published in the past five years have been cited in the JCR year. It is calculated by dividing the number of citations in the JCR year by the total number of articles published in the five previous years.

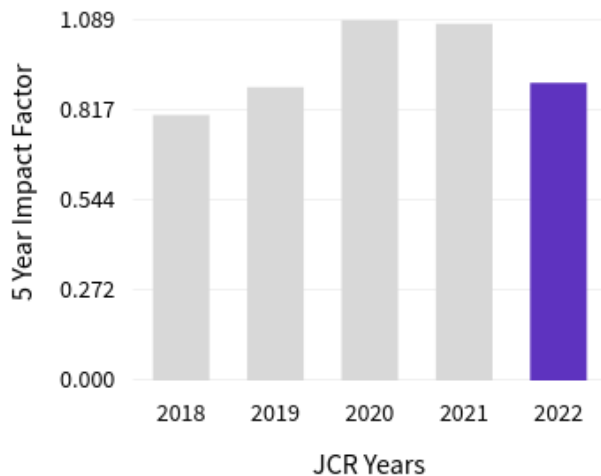

5 year Impact Factor calculation

|                                                              |   |     |   |     |
|--------------------------------------------------------------|---|-----|---|-----|
| Citations in 2022 to items published in [2017-2021]<br>(409) | = | 409 | = | 0.9 |
| Number of citable items in [2017-2021] (462)                 |   | 462 |   |     |

# Immediacy Index

0.4

The Immediacy Index is the count of citations in the current year to the journal that reference content in this same year. Journals that have a consistently high Immediacy Index attract citations rapidly.

[Learn more](#)

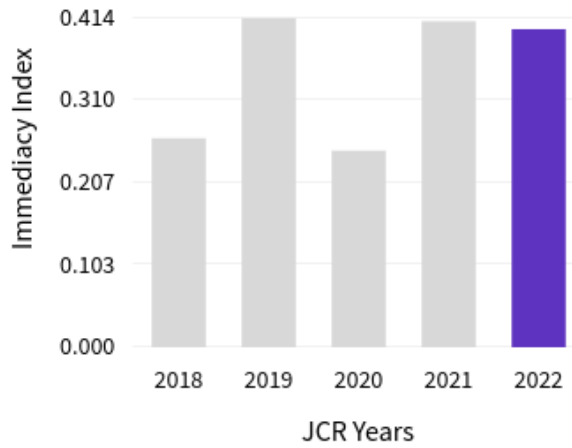

Immediacy Index calculation

|                                          |    |               |
|------------------------------------------|----|---------------|
| Cites in 2022 to items published in 2022 | 20 |               |
| <hr/>                                    |    | 20 / 51 = 0.4 |
| Number of items published in 2022        | 51 |               |
